# Supplementary material
Source: PubMed Central journal article supplement (PMC8008018)
Supplement: 40271_2021_508_MOESM1_ESM.pdf [file 40271_2021_508_MOESM1_ESM.pdf]

## 2020 United States COVID-19 Vaccination Preference (CVP) Study

### Appendix 1. External Validity

16 November 2020

Benjamin M. Craig, PhD, [benjamin.craig@iahpr.org](mailto:benjamin.craig@iahpr.org)

This appendix compares the respondent characteristics of the analytical sample with estimates taken from the 2019 American Community Survey (ACS) 1-year estimate for US adults (age 18 or older) conducted by the U.S. Census Bureau. Its results reflect the observable biases compared to the US general population to aid the interpretation of the results.

Understanding sampling frame, recruitment, and participation biases aids in the interpretation of the survey evidence. Respondents for this study were recruited from an online panel between November 9 to 12, 2020 to achieve specific eighteen demographic quotas (see protocol). Recruitment ended when a minimum number of respondents in each quota was achieved. Due to inherent biases in online panels, the respondents in each quota are not a representative sample of all US adults who might qualify, because some US adults do not participate in online panels. Nevertheless, the respondents in the analytical sample are diverse as shown in these tables, which allows inferences based on observable characteristics and behavioral responses within the analytical sample. Chi-square goodness-of-fit tests were conducted to produce the p-values between the completes and the ACS estimates.

Apart from the limitations of the sampling frame and recruitment, this appendix compares the self-reported characteristics of respondents who dropped out of the 2020 US CVP study before completion and those who completed the survey (i.e., analytical sample). After qualifying for the study, 376 respondents (33%) dropped out: 95 (8%) during the background section; 222 (19%) during the choice tasks; and 59 (5%) during the follow-up. Therefore, the respondents in the analytical sample may differ from the respondents in the panel more generally. Chi-square tests were conducted to produce the p-values between the drop-outs and completes.

All predictions based on the analytical sample must account for the observable and unobservable differences between the analytical sample and the general population of US adults. For example, this study did not include non-English speakers, persons with access to a tablet or computer, or persons in many institutional settings. Although sampling weights may be applied to the quotas, sampling weights cannot address unobservable biases due to the sampling frame, recruitment, and participation. Nevertheless, the predictions are largely generalizable to US adults who share the characteristics described in the analytical sample.

U.S. Census Bureau. (2020). 2019 American Community Survey 1-year Public Use Microdata Samples. Accessed on 10 November 2020. Retrieved from <https://www.census.gov/acs/>

Table 1. Demographic Characteristics

|                                                    | dropouts      | completes     | p-value | ACS   | p-value |
|----------------------------------------------------|---------------|---------------|---------|-------|---------|
|                                                    | 100.00 ( 376) | 100.00 (1153) |         |       |         |
| Age in years                                       |               |               |         |       |         |
| 18 to 34                                           | 22.07 ( 83)   | 29.14 ( 336)  | <0.001  | 29.75 | <0.001  |
| 35 to 54                                           | 29.52 ( 111)  | 38.68 ( 446)  |         | 32.43 |         |
| 55 and older                                       | 48.40 ( 182)  | 32.18 ( 371)  |         | 37.82 |         |
| Gender                                             |               |               |         |       |         |
| Male                                               | 46.81 ( 176)  | 48.74 ( 562)  | 0.158   | 48.68 | 0.993   |
| Female                                             | 52.39 ( 197)  | 51.08 ( 589)  |         | 51.32 |         |
| other/prefer not to say                            | 0.80 ( 3)     | 0.17 ( 2)     |         |       |         |
| Race                                               |               |               |         |       |         |
| White alone                                        | 74.47 ( 280)  | 76.67 ( 884)  | 0.502   | 73.61 | 0.004   |
| Black or African American alone                    | 12.23 ( 46)   | 12.06 ( 139)  |         | 12.45 |         |
| American Indian or Alaska Native alone             | 1.60 ( 6)     | 0.87 ( 10)    |         | 0.83  |         |
| Asian alone                                        | 6.38 ( 24)    | 6.24 ( 72)    |         | 5.92  |         |
| Native Hawaiian or Other Pacific<br>Islander alone | 0.00 ( 0)     | 0.26 ( 3)     |         | 0.18  |         |
| Some other race alone                              | 3.72 ( 14)    | 2.17 ( 25)    |         | 4.56  |         |
| Two or more races                                  | 1.60 ( 6)     | 1.73 ( 20)    |         | 2.46  |         |
| Ethnicity                                          |               |               |         |       |         |
| Hispanic or Latino                                 | 11.70 ( 44)   | 12.75 ( 147)  | 0.594   | 16.40 | 0.001   |
| Other                                              | 88.30 ( 332)  | 87.25 (1006)  |         | 83.60 |         |

Table 2. Respondents by US State

|                      | Drop-outs     | Completes     | p-value | ACS   | p-value |
|----------------------|---------------|---------------|---------|-------|---------|
|                      | 100.00 ( 376) | 100.00 (1153) |         |       |         |
| Alabama              | 1.06 ( 4)     | 1.47 ( 17)    | 0.169   | 1.50  | 0.026   |
| Alaska               | 0.80 ( 3)     | 0.09 ( 1)     |         | 0.22  |         |
| Arizona              | 3.19 ( 12)    | 2.17 ( 25)    |         | 2.21  |         |
| Arkansas             | 0.80 ( 3)     | 0.78 ( 9)     |         | 0.91  |         |
| California           | 10.90 ( 41)   | 11.71 ( 135)  |         | 12.00 |         |
| Colorado             | 1.33 ( 5)     | 1.56 ( 18)    |         | 1.76  |         |
| Connecticut          | 1.86 ( 7)     | 1.04 ( 12)    |         | 1.11  |         |
| Delaware             | 0.80 ( 3)     | 0.26 ( 3)     |         | 0.30  |         |
| District of Columbia | 0.27 ( 1)     | 0.09 ( 1)     |         | 0.23  |         |
| Florida              | 10.64 ( 40)   | 9.71 ( 112)   |         | 6.76  |         |
| Georgia              | 3.19 ( 12)    | 3.30 ( 38)    |         | 3.18  |         |
| Hawaii               | 0.80 ( 3)     | 0.26 ( 3)     |         | 0.44  |         |
| Idaho                | 0.80 ( 3)     | 0.43 ( 5)     |         | 0.52  |         |
| Illinois             | 4.52 ( 17)    | 4.34 ( 50)    |         | 3.86  |         |
| Indiana              | 1.60 ( 6)     | 1.47 ( 17)    |         | 2.02  |         |
| Iowa                 | 0.53 ( 2)     | 0.69 ( 8)     |         | 0.95  |         |
| Kansas               | 1.33 ( 5)     | 0.61 ( 7)     |         | 0.87  |         |
| Kentucky             | 1.60 ( 6)     | 1.30 ( 15)    |         | 1.36  |         |
| Louisiana            | 0.53 ( 2)     | 0.87 ( 10)    |         | 1.40  |         |
| Maine                | 0.80 ( 3)     | 0.26 ( 3)     |         | 0.43  |         |
| Maryland             | 2.39 ( 9)     | 2.25 ( 26)    |         | 1.85  |         |
| Massachusetts        | 0.80 ( 3)     | 2.08 ( 24)    |         | 2.17  |         |
| Michigan             | 1.86 ( 7)     | 2.86 ( 33)    |         | 3.07  |         |
| Minnesota            | 1.60 ( 6)     | 1.04 ( 12)    |         | 1.70  |         |
| Mississippi          | 0.80 ( 3)     | 0.43 ( 5)     |         | 0.89  |         |
| Missouri             | 0.80 ( 3)     | 1.65 ( 19)    |         | 1.87  |         |
| Montana              | 0.00 ( 0)     | 0.52 ( 6)     |         | 0.33  |         |
| Nebraska             | 0.00 ( 0)     | 0.35 ( 4)     |         | 0.57  |         |
| Nevada               | 1.06 ( 4)     | 0.69 ( 8)     |         | 0.94  |         |
| New Hampshire        | 0.53 ( 2)     | 0.43 ( 5)     |         | 0.43  |         |
| New Jersey           | 2.66 ( 10)    | 2.34 ( 27)    |         | 2.72  |         |
| New Mexico           | 0.53 ( 2)     | 0.87 ( 10)    |         | 0.64  |         |
| New York             | 12.23 ( 46)   | 8.85 ( 102)   |         | 6.05  |         |
| North Carolina       | 3.72 ( 14)    | 2.86 ( 33)    |         | 3.21  |         |
| North Dakota         | 0.53 ( 2)     | 0.09 ( 1)     |         | 0.23  |         |
| Ohio                 | 2.13 ( 8)     | 3.90 ( 45)    |         | 3.57  |         |
| Oklahoma             | 0.53 ( 2)     | 0.43 ( 5)     |         | 1.18  |         |
| Oregon               | 0.80 ( 3)     | 1.04 ( 12)    |         | 1.31  |         |

|                |            |             |      |
|----------------|------------|-------------|------|
| Pennsylvania   | 3.99 ( 15) | 3.30 ( 38)  | 3.98 |
| Rhode Island   | 0.27 ( 1)  | 0.43 ( 5)   | 0.34 |
| South Carolina | 2.13 ( 8)  | 1.65 ( 19)  | 1.58 |
| South Dakota   | 0.00 ( 0)  | 0.00 (0.00) | 0.23 |
| Tennessee      | 0.27 ( 1)  | 2.25 ( 26)  | 2.08 |
| Texas          | 5.59 ( 21) | 9.37 ( 108) | 8.46 |
| Utah           | 1.06 ( 4)  | 0.52 ( 6)   | 0.89 |
| Vermont        | 0.27 ( 1)  | 0.17 ( 2)   | 0.20 |
| Virginia       | 1.86 ( 7)  | 2.52 ( 29)  | 2.62 |
| Washington     | 1.86 ( 7)  | 1.99 ( 23)  | 2.33 |
| West Virginia  | 0.80 ( 3)  | 0.26 ( 3)   | 0.56 |
| Wisconsin      | 1.33 ( 5)  | 2.34 ( 27)  | 1.79 |
| Wyoming        | 0.27 ( 1)  | 0.09 ( 1)   | 0.17 |

Figure 1. Concordance between the analytical sample and population percentage by US state\*

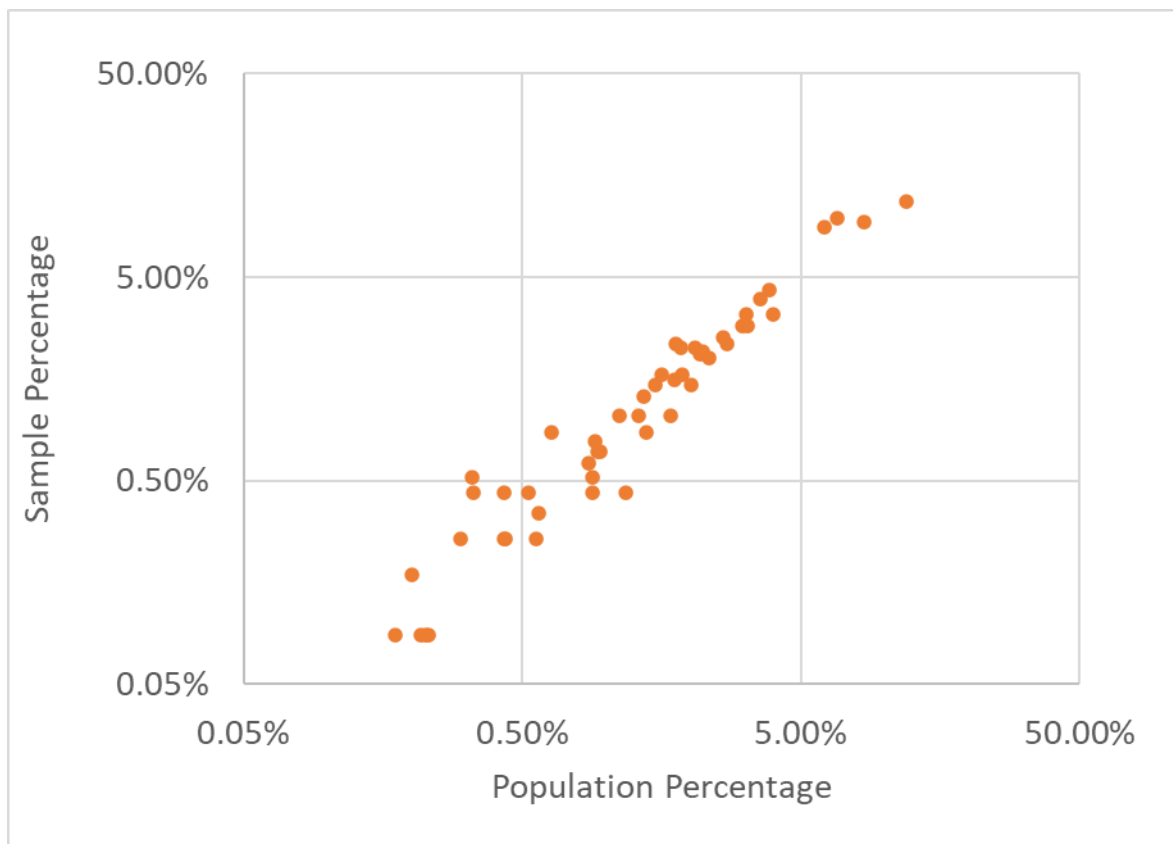

\* Each dot represents a US state or the District of Columbia. The axes are on a log scale to better illustrate concordance. South Dakota is not shown, because its sample percentage is zero.

Table 3. SES characteristics within the analytical sample

|                                    | Completes     | ACS   | p-value |
|------------------------------------|---------------|-------|---------|
|                                    | 100.00 (1153) |       |         |
| Marital status                     |               |       |         |
| Married                            | 53.69 ( 619)  | 53.07 | 0.090   |
| Divorced                           | 8.67 ( 100)   | 11.47 |         |
| Separated                          | 1.91 ( 22)    | 1.89  |         |
| never married                      | 33.04 ( 381)  | 33.56 |         |
| don't know/not sure/refuse         | 2.69 ( 31)    |       |         |
| Educational attainment             |               |       |         |
| Less than 9th grade                | 0.43 ( 5)     | 4.26  | <0.001  |
| 9th to 12th grade, no diploma      | 1.56 ( 18)    | 5.78  |         |
| High school graduate               | 12.58 ( 145)  | 23.69 |         |
| Some college, no degree            | 15.18 ( 175)  | 17.59 |         |
| Associate's degree                 | 9.45 ( 109)   | 7.59  |         |
| Bachelor's degree                  | 49.61 ( 572)  | 17.91 |         |
| Graduate or professional degree    | 5.03 ( 58)    | 11.27 |         |
| Age 18 to 24 years                 | 6.16 ( 71)    | 11.9  |         |
| Household income in 2019           |               |       |         |
| Less than \$10,000                 | 11.71 ( 135)  | 5.80  | <0.001  |
| \$10,000 to \$49,999               | 23.24 ( 268)  | 32.61 |         |
| \$50,000 to \$74,999               | 17.61 ( 203)  | 17.37 |         |
| \$75,000 to \$99,999               | 17.17 ( 198)  | 12.83 |         |
| \$100,000 to \$149,999             | 18.65 ( 215)  | 15.73 |         |
| \$150,000 or more                  | 11.62 ( 134)  | 15.65 |         |
| Work status in the last week*      |               |       |         |
| Working                            | 47.96 ( 553)  |       |         |
| employed, not working              | 6.16 ( 71)    |       |         |
| looking for work                   | 8.93 ( 103)   |       |         |
| not working, not looking           | 9.80 ( 113)   |       |         |
| Retired                            | 23.50 ( 271)  |       |         |
| don't know/not sure/refuse         | 3.64 ( 42)    |       |         |
| Current community*                 |               |       |         |
| urban, 1,000,000 persons or more   | 16.05 ( 185)  |       |         |
| urban, less than 1,000,000 persons | 19.17 ( 221)  |       |         |
| Suburban                           | 47.79 ( 551)  |       |         |
| Rural                              | 15.87 ( 183)  |       |         |
| don't know/not sure/refuse         | 1.13 ( 13)    |       |         |

\* Work status and current community is not part of the 2019 ACS.

Table 5. General health characteristics of the analytical sample

|                                    | completes     |
|------------------------------------|---------------|
|                                    | 100.00 (1153) |
| EQ-5D-5L                           |               |
| No health problems                 | 41.89 ( 483)  |
| One or more problems               | 58.11 ( 670)  |
| EQ-VAS                             |               |
| 90 to 100 (best health imaginable) | 30.44 ( 351)  |
| 80 to 89                           | 26.97 ( 311)  |
| 70 to 79                           | 18.73 ( 216)  |
| 60 to 69                           | 9.71 ( 112)   |
| 1 (worst health imaginable) to 59  | 14.14 ( 163)  |

Table 6. Risk for COVID-19 within the analytical sample\*

|                                                                                              | Completes     | Essential workers | High risk    | Reduced access | None         | p-value |
|----------------------------------------------------------------------------------------------|---------------|-------------------|--------------|----------------|--------------|---------|
| Critical populations:                                                                        | 100.00 (1153) | 16.05 ( 185)      | 29.75 ( 343) | 2.69 ( 31)     | 51.52 ( 594) |         |
| None of these statements                                                                     | 53.25 ( 614)  | 58.92 ( 109)      | 15.16 ( 52)  | 25.81 ( 8)     | 74.92 ( 445) | <0.001  |
| a person age 65 years or older                                                               | 24.11 ( 278)  | 4.86 ( 9)         | 49.27 ( 169) | 9.68 ( 3)      | 16.33 ( 97)  | <0.001  |
| a person with diabetes, a heart condition, or severe obesity                                 | 13.01 ( 150)  | 17.30 ( 32)       | 27.41 ( 94)  | 12.90 ( 4)     | 3.37 ( 20)   | <0.001  |
| a person with asthma, breathing difficulties, or lung problems                               | 10.67 ( 123)  | 9.73 ( 18)        | 20.12 ( 69)  | 25.81 ( 8)     | 4.71 ( 28)   | <0.001  |
| a person with a severe illness placing them at higher risk, such as a weakened immune system | 8.59 ( 99)    | 11.35 ( 21)       | 17.49 ( 60)  | 16.13 ( 5)     | 2.19 ( 13)   | <0.001  |
| a person who resides in a nursing home or long-term care facility                            | 3.47 ( 40)    | 5.41 ( 10)        | 5.25 ( 18)   | 6.45 ( 2)      | 1.68 ( 10)   | 0.008   |
| a person with chronic kidney or liver disease                                                | 2.78 ( 32)    | 2.70 ( 5)         | 5.25 ( 18)   | 12.90 ( 4)     | 0.84 ( 5)    | <0.001  |
| a woman who is pregnant or breastfeeding                                                     | 0.35 ( 4)     | 0.54 ( 1)         | 0.29 ( 1)    | 0.00 ( 0)      | 0.34 ( 2)    | 0.952   |

\* The definitions of critical populations and at-risk groups were taken from the CDC and self-reported (see screenshots of the survey instrument). For this table, respondents were categorized into critical populations hierarchically (e.g., high risk excludes essential workers).

Table 7. Diagnosis and symptoms of COVID-19\*

|                                             | Completes     | Tested positive | Recommended to self-quarantine | None         | p-value |
|---------------------------------------------|---------------|-----------------|--------------------------------|--------------|---------|
| Clinical diagnosis:                         | 100.00 (1153) | 3.30 ( 38)      | 11.62 ( 134)                   | 85.08 ( 981) |         |
| no symptoms                                 | 71.12 ( 820)  | 42.11 ( 16)     | 21.64 ( 29)                    | 79.00 ( 775) | <0.001  |
| cough                                       | 11.01 ( 127)  | 31.58 ( 12)     | 44.03 ( 59)                    | 5.71 ( 56)   | <0.001  |
| fever                                       | 10.67 ( 123)  | 42.11 ( 16)     | 50.00 ( 67)                    | 4.08 ( 40)   | <0.001  |
| headache                                    | 7.89 ( 91)    | 18.42 ( 7)      | 26.87 ( 36)                    | 4.89 ( 48)   | <0.001  |
| congestion or runny nose                    | 6.85 ( 79)    | 21.05 ( 8)      | 12.69 ( 17)                    | 5.50 ( 54)   | <0.001  |
| fatigue                                     | 6.16 ( 71)    | 7.89 ( 3)       | 15.67 ( 21)                    | 4.79 ( 47)   | <0.001  |
| muscle or body aches                        | 5.98 ( 69)    | 13.16 ( 5)      | 19.40 ( 26)                    | 3.87 ( 38)   | <0.001  |
| shortness of breath or difficulty breathing | 3.99 ( 46)    | 15.79 ( 6)      | 12.69 ( 17)                    | 2.34 ( 23)   | <0.001  |
| diarrhea                                    | 3.73 ( 43)    | 7.89 ( 3)       | 11.94 ( 16)                    | 2.45 ( 24)   | <0.001  |
| sore throat                                 | 3.12 ( 36)    | 0.00 ( 0)       | 13.43 ( 18)                    | 1.83 ( 18)   | <0.001  |
| nausea or vomiting                          | 2.43 ( 28)    | 10.53 ( 4)      | 9.70 ( 13)                     | 1.12 ( 11)   | <0.001  |
| new loss of taste or smell                  | 2.17 ( 25)    | 7.89 ( 3)       | 9.70 ( 13)                     | 0.92 ( 9)    | <0.001  |

\* The definitions of clinical diagnosis and symptom were taken from the CDC and self-reported (see screenshots). For this table, respondents were categorized by clinical diagnosis hierarchically (e.g., those recommended to self-quarantine excludes those who tested positive).
