# Supplementary material
Source: PubMed Central journal article supplement (PMC8008018)
Supplement: 40271_2021_508_MOESM2_ESM.pdf [file 40271_2021_508_MOESM2_ESM.pdf]

## 2020 United States COVID-19 Vaccination Preference (CVP) Study

### Appendix 2. Internal Validity

16 November 2020

Benjamin M. Craig, PhD, [benjamin.craig@iahpr.org](mailto:benjamin.craig@iahpr.org)

This appendix examines the association between the randomized components of the survey instrument and respondent behaviors. In this study, each respondent is randomly assigned an attribute order and a series of eight sets (i.e., block), which are shown in a random sequence and with random object position (i.e., A, B, C). These random components may have influenced respondent behaviors:

1. **length of survey:** time in seconds from first page load to clicking submit
2. **straight lining:** identical responses for all tasks (always same column, e.g., always opt-out)
3. **consistency:** choosing opt-out in the singleton and choice tasks consistently
4. **dominance:** selection of a dominated object during the warm-up task
5. **response time:** time in seconds from page load to clicking next in a choice task
6. **changed response:** one or more responses before the final response in a choice task
7. **response location:** the location of the response option selected in a choice task

Understanding the effects of random components aids in the interpretation of the preference evidence. This study includes four choice tasks: singleton, non-adaptive, adaptive, and qualitative; however, this report focuses on behaviors related to the non-adaptive tasks.

Except for blocks, all randomized components were assigned independently using respondent-level random number seeds. Blocks were assigned serially to distribute them more evenly within quotas.

To assess whether the randomized components were uniformly distributed, chi-square goodness-of-fit tests were conducted to produce p-values. Rejecting a uniform distribution is noteworthy but does not imply a loss in internal validity if the component is randomized. Failing to reject a uniform distribution is also a noteworthy indicator of entropy. In addition, chi-square tests were conducted to assess the association between individual-level random components and quotas.

To assess the association between the randomized components and the time-related behaviors, Wald tests for quantile regressions were conducted to produce p-values.

To assess the association between the randomized components and discrete behaviors, chi-square tests were conducted to produce p-values.

An association between response behaviors and randomized components implies that aspects of the experiment beyond preferences caused respondents to alter their behaviors. The identification of a significant association implies a loss in internal validity and may motivate further investigation of its source as well as its control within a sensitivity analysis.

Table 1. Randomized components

|                                                        | Proportions    | H <sup>0</sup> : uniform p-value | Quotas p-values |
|--------------------------------------------------------|----------------|----------------------------------|-----------------|
| Designs for each respondent (3 designs)*               | 31.83 to 35.82 | 0.197                            | 0.923           |
| Blocks for each respondent (21 blocks)                 | 3.64 to 5.98   | 0.477                            | 1.000           |
| Attributes order for each respondent (120 orders [5!]) | 0.09 to 7.03   | <0.001                           | 0.290           |
| Sequence positions of each set (8 positions)           | 9.80 to 14.48  | 0.714                            |                 |
| Object positions in each set (6 orders [3!])           | 6.24 to 34.17  | <0.001                           |                 |

\* For example, the respondents were randomly assigned to one of three possible designs: 31.83% random design, 32.35% generator-developed design, and 35.82% efficient design. The chi-square goodness of fit test fails to reject the null hypothesis of a uniform distribution (33%, 33%, 33%) and the second chi-square test fails to find association between design and quota.

Table 2. Length of survey

|                     | Median | IQR      | p-value |
|---------------------|--------|----------|---------|
| All                 | 1130   | 790-1584 |         |
| Designs (3)         |        |          |         |
| Random              | 1122   | 803-1618 | 0.932   |
| Generator-developed | 1122   | 760-1540 |         |
| Efficient design    | 1139   | 800-1590 |         |
| Blocks (21)         |        |          |         |
| Minimum             | 898    | 764-1515 | 0.013   |
| Maximum             | 1465   | 967-1909 |         |

Table 5. Median length of survey conditional on an attribute placed at a specific row

|            | Proof*  | Setting | Effectiveness | Duration | Risk**  | p-value |
|------------|---------|---------|---------------|----------|---------|---------|
| First row  | 1121.34 | 1139.29 | 1036.04       | 1131.94  | 1177.45 | 0.325   |
| Second row | 1149.26 | 1092.26 | 1141.74       | 1133.98  | 1130.4  | 0.913   |
| Third row  | 1157.63 | 1132.87 | 1101.95       | 1118.76  | 1132.8  | 0.946   |
| Fourth row | 1136.08 | 1133.98 | 1197.26       | 1087.79  | 1051.75 | 0.198   |
| Fifth row  | 1055.32 | 1155.81 | 1131.34       | 1156.93  | 1141.58 | 0.455   |
| p-value    | 0.512   | 0.927   | 0.158         | 0.869    | 0.359   |         |

\* For example, when proof of vaccination is in the first row, the median length of survey is 1121.34 seconds. The attribute in the first row not affects the median response time (p-value = 0.325).

Table 3. Straight lining, consistency, and dominance\*

|                      | All           | Straight lining | Always opt-out | Never opt-out | Sometimes opt-out | p-value |
|----------------------|---------------|-----------------|----------------|---------------|-------------------|---------|
| All                  | 100.00 (1153) | 2.78 (32)       | 7.55 (87)      | 76.76 (885)   | 12.92 (149)       |         |
| Vaccination question |               |                 |                |               |                   |         |
| Yes                  | 61.06 (704)   | 2.98 (21)       | 0.85 (6)       | 88.07 (620)   | 8.10 (57)         | <0.001  |
| Don't know/not sure  | 22.38 (258)   | 1.55 (4)        | 9.69 (25)      | 68.60 (177)   | 20.16 (52)        |         |
| No                   | 16.57 (191)   | 3.66 (7)        | 29.32 (56)     | 46.07 (88)    | 20.94 (40)        |         |
| Warmup task          |               |                 |                |               |                   |         |
| Best vaccination     | 64.18 (740)   | 2.03 (15)       | 1.89 (14)      | 83.24 (616)   | 12.84 (95)        | <0.001  |
| Dominated once       | 14.83 (171)   | 5.85 (10)       | 0.00 (0)       | 83.04 (142)   | 11.11 (19)        |         |
| Dominated twice      | 12.32 (142)   | 4.93 (7)        | 1.41 (2)       | 82.39 (117)   | 11.27 (16)        |         |
| Opt-out              | 8.67 (100)    | 0.00 (0)        | 71.00 (71)     | 10.00 (10)    | 19.00 (19)        |         |
| Designs (3)**        |               |                 |                |               |                   |         |
| Random               | 35.82 (413)   | 2.66 (11)       | 8.72 (36)      | 74.09 (306)   | 14.53 (60)        | 0.329   |
| Generator-developed  | 32.35 (373)   | 3.75 (14)       | 7.24 (27)      | 78.55 (293)   | 10.46 (39)        |         |
| Efficient design     | 31.83 (367)   | 1.91 (7)        | 6.54 (24)      | 77.93 (286)   | 13.62 (50)        |         |

\* Straight lining refers to always choose the same vaccination position. Opt-out is “no vaccination for six months.”

\*\* The association between the 21 blocks and these four response categories is 0.981. The association between attribute position and these four categories is 0.994. This test was repeated to examine the attributes in specific positions and the specific positions of each attribute, and their p-values ranged from 0.166 to 0.977.

Table 5. Median response time conditional on an attribute placed at a specific row

|            | Proof* | Setting | Effectiveness | Duration | Risk** | p-value |
|------------|--------|---------|---------------|----------|--------|---------|
| First row  | 10.06  | 8.35    | 8.52          | 10.23    | 11.09  | <0.001  |
| Second row | 9.22   | 9.24    | 10.42         | 10.15    | 10.22  | <0.001  |
| Third row  | 9.96   | 10.41   | 9.69          | 9.25     | 9.38   | 0.007   |
| Fourth row | 9.07   | 10.27   | 10.05         | 9.38     | 9.46   | 0.005   |
| Fifth row  | 10.01  | 10.78   | 10.18         | 9.74     | 8.9    | <0.001  |
| p-value    | 0.014  | <0.001  | <0.001        | 0.021    | <0.001 |         |

\* For example, when proof of vaccination is in the first row, the median response time is 10.06 second. The attribute in the first row affects the median response time (p-value <0.001).

Table 5. Changed response conditional on an attribute placed at a specific row

|            | Proof* | Setting | Effectiveness | Duration | Risk** | p-value |
|------------|--------|---------|---------------|----------|--------|---------|
| First row  | 6.12   | 6.32    | 5.12          | 8.67     | 7.28   | <0.001  |
| Second row | 7.45   | 7.20    | 6.41          | 5.79     | 6.26   | 0.147   |
| Third row  | 6.86   | 7.59    | 6.77          | 5.5      | 6.41   | 0.104   |
| Fourth row | 5.84   | 5.75    | 7.71          | 7.56     | 6.40   | 0.023   |
| Fifth row  | 7.13   | 5.66    | 7.13          | 5.88     | 6.90   | 0.263   |
| p-value    | 0.204  | 0.046   | 0.026         | <0.001   | 0.681  |         |

\* For example, when proof of vaccination is in the first row, the median length of survey is 1121.34 seconds. The attribute in the first row not affect the median response time (p-value = 0.325).

Table 4. Response time and changed response

|                      | Response time |            |         | Changed response |         |
|----------------------|---------------|------------|---------|------------------|---------|
|                      | Median        | IQR        | p-value | %                | p-value |
| All                  | 9.74          | 5.01-17.95 |         | 6.70             |         |
| Designs (3)          |               |            |         |                  |         |
| Random               | 10.25         | 5.34-18.56 | 0.001   | 7.18             | 0.333   |
| Generator-developed  | 9.32          | 4.78-16.93 |         | 6.46             |         |
| Efficient design     | 9.55          | 4.95-18.16 |         | 6.39             |         |
| Blocks (21)          |               |            |         |                  |         |
| Minimum              | 8.11          | 4.58-13.46 | <0.001  | 4.48             | <0.001  |
| Maximum              | 12.63         | 6.76-20.18 |         | 11.64            |         |
| Set (168 [21 x 8])   |               |            |         |                  |         |
| Minimum              | 6.11          | 3.93-10.90 | 0.920   | 0.00             | <0.001  |
| Maximum              | 12.96         | 5.75-20.18 |         | 19.75            |         |
| Task sequence (8)    |               |            |         |                  |         |
| Warm-up              | 18.27         | 9.42-30.60 | <0.001  | 11.19            | <0.001  |
| 1 <sup>st</sup> task | 12.79         | 6.40-23.52 |         | 7.55             |         |
| 2 <sup>nd</sup> task | 10.19         | 5.46-18.01 |         | 6.16             |         |
| 3 <sup>rd</sup> task | 9.17          | 4.89-15.98 |         | 5.72             |         |
| 4 <sup>th</sup> task | 8.88          | 4.58-16.00 |         | 6.58             |         |
| 5 <sup>th</sup> task | 8.63          | 4.32-15.59 |         | 5.72             |         |
| 6 <sup>th</sup> task | 8.28          | 4.37-14.85 |         | 5.98             |         |
| 7 <sup>th</sup> task | 7.92          | 4.34-14.15 |         | 5.81             |         |
| 8 <sup>th</sup> task | 8.17          | 4.44-14.03 |         | 5.46             |         |

Figure 1. Task sequence and response location (p-value = 0.038)\*

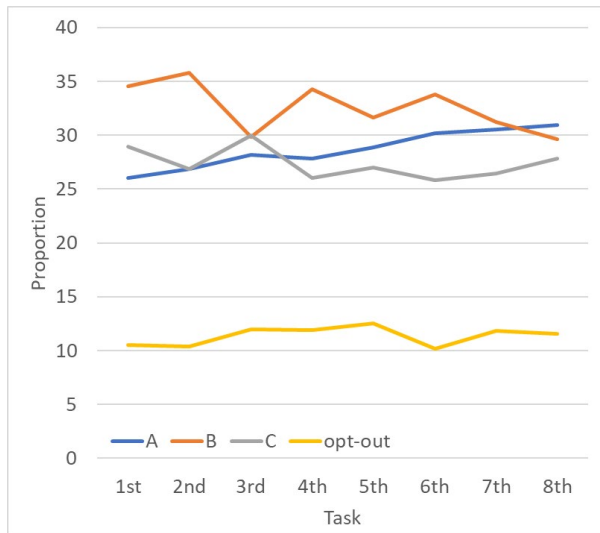

\* The results showed no association between task sequence and the selection of any specific alternative (p-value 0.873)
